# Supplementary material for: A Prospective Evaluation of Circulating Tumor Cells and Cell-Free DNA in EGFR -Mutant Non–Small Cell Lung Cancer Patients Treated with Erlotinib on a Phase II Trial
Source: Oxford University Press journal article supplement (doi:10.1158/1078-0432.ccr-16-0909), 2016-06-09
Supplement: 10780432ccr160909-sup-164773_1_supp_0_f8fn0t.docx [file 10780432ccr160909-sup-164773_1_supp_0_f8fn0t.docx]

**Supplemental Figure 1.** Shown is the schema of study design and enrollment.([30](#_ENREF_30)) As noted, the cut-off for data analysis was May 15, 2015.

**Supplemental Figure 2.** CD45-/Cytokeratin+ positive cell as seen in the left panel, with *EGFR* and *MET* FISH shown on the same cell in the right panel. This cell would be identified as a CTC based upon CD45/cytokeratin results even though neither EGFR nor MET amplification or polysomy are seen.
